# Supplementary material for: Synthesis of Pyrazolyl Acrylamide-Chalcone Conjugates with Sub-Micromolar Antitrypanosomal Activities
Source: Research Square preprint supplement (doi:10.21203/rs.3.rs-6869476/v1), 2025-07-18
Supplement: Supplementary file 1 [file beb17cff3aab9ab77931e242.docx]

**Synthesis of Pyrazolyl Acrylamide-Chalcone Conjugates with Sub-Micromolar Antitrypanosomal Activities**

Devesh S Agarwal*a*, Karol R. Franciscob, Richard M. Beteck*a*, Yashpreet Kaur b, Adeline Y. Cheng b, Conor R. Caffreyb*, Lesetja J. Legoabe*a**

*a*Centre of Excellence for Pharmaceutical Sciences, North-West University, Potchefstroom 2520, South Africa; *b*Center for Discovery and Innovation in Parasitic Diseases, Skaggs School of Pharmacy and Pharmaceutical Sciences, 9255 Pharmacy Lane, MC0657, University of California San Diego, La Jolla, CA 92093, USA

*Corresponding Authors: LJL- lesetja.legoabe@nwu.ac.za; Tel.: +27 18 299 2182.

CRC- ccaffrey@health.ucsd.edu; Tel.: +1 858 534 5340.

**Supporting information**

| **S. No.** |  | **Page No.** |
| --- | --- | --- |
| **1** | 1H and 13C NMR of **3** |  |
| **2** | 1H and 13C NMR of **5a-m** |  |
| **5** | HRMS spectra of **3** & **5a-m** |  |

**1H NMR of 3**

**
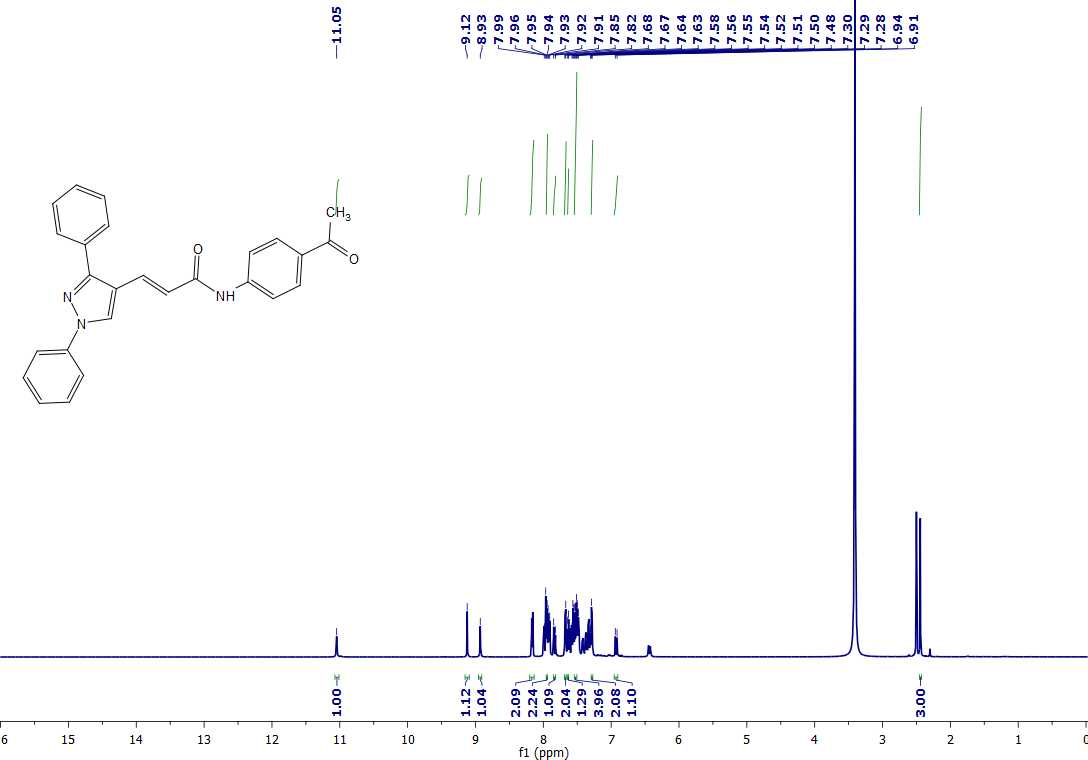
**

**13C NMR of 3**

**1H NMR of 5a**

**
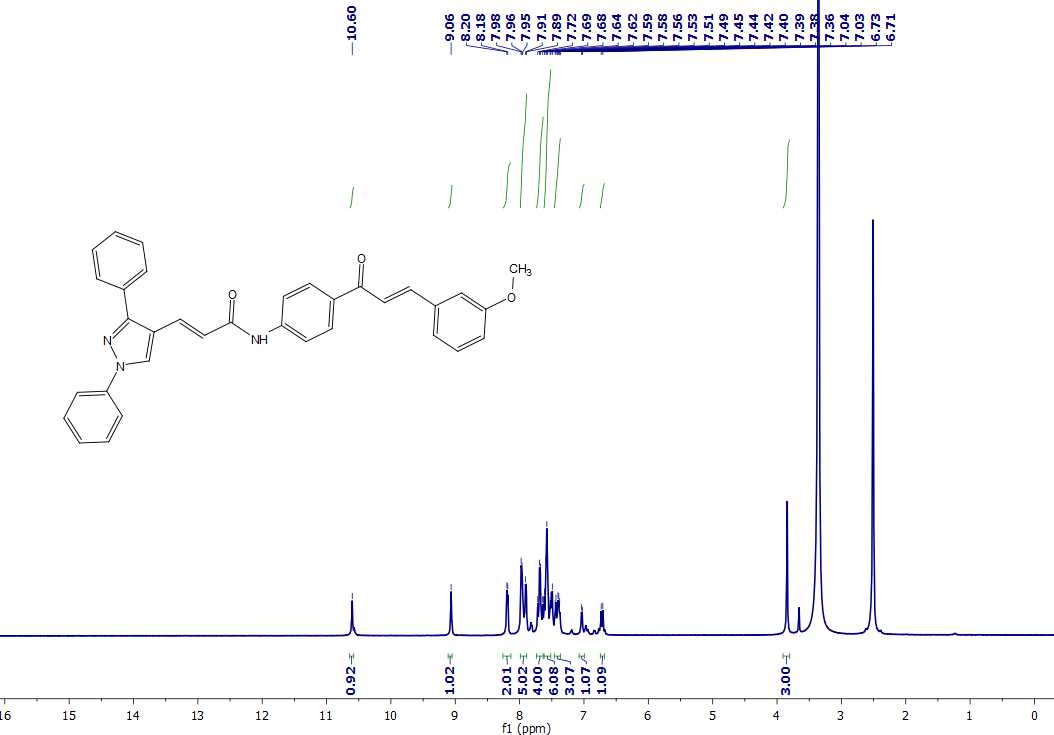
**

**13C NMR of 5a
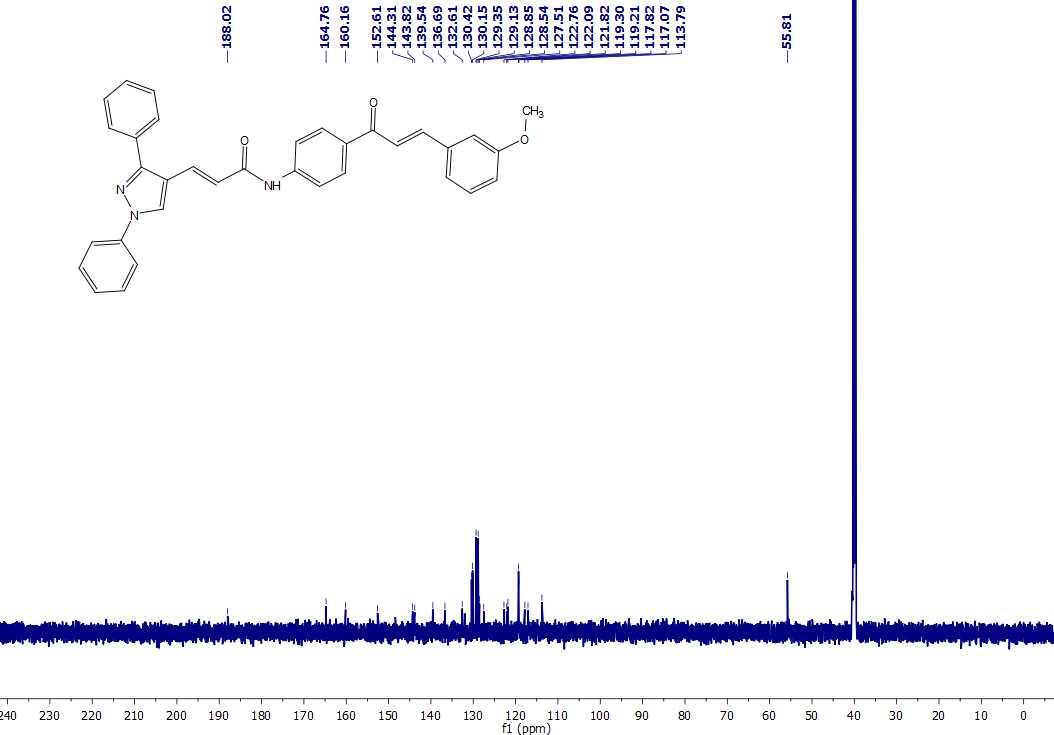
**

**1H NMR of 5b**

**
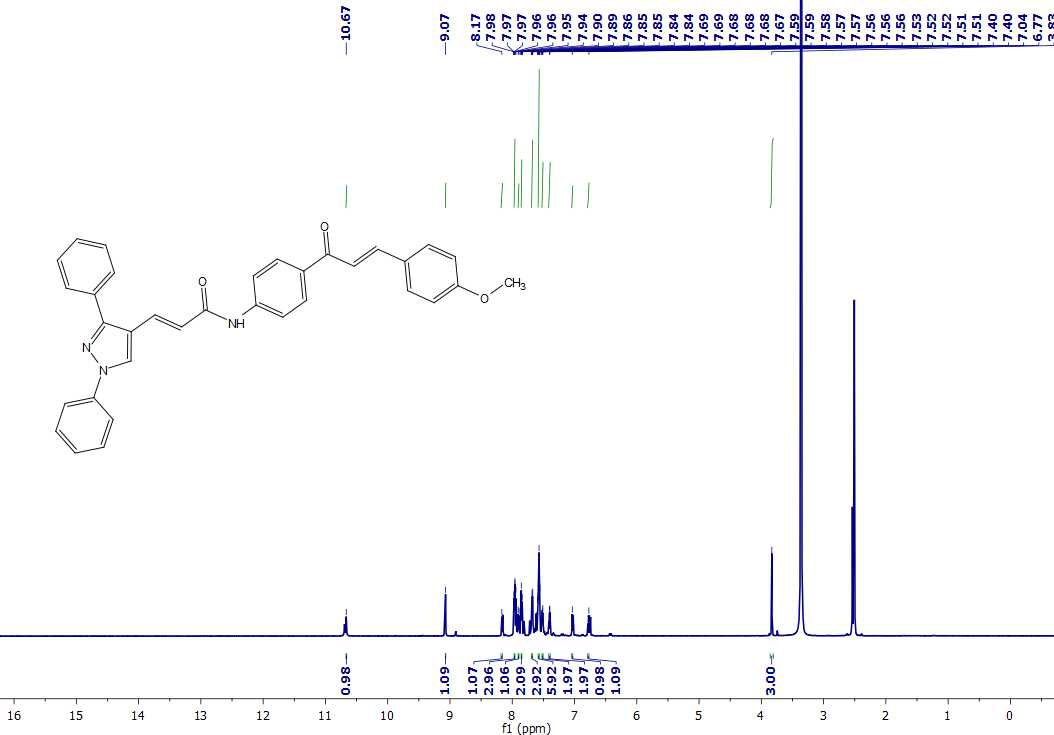
**

**13C NMR of 5b**

**
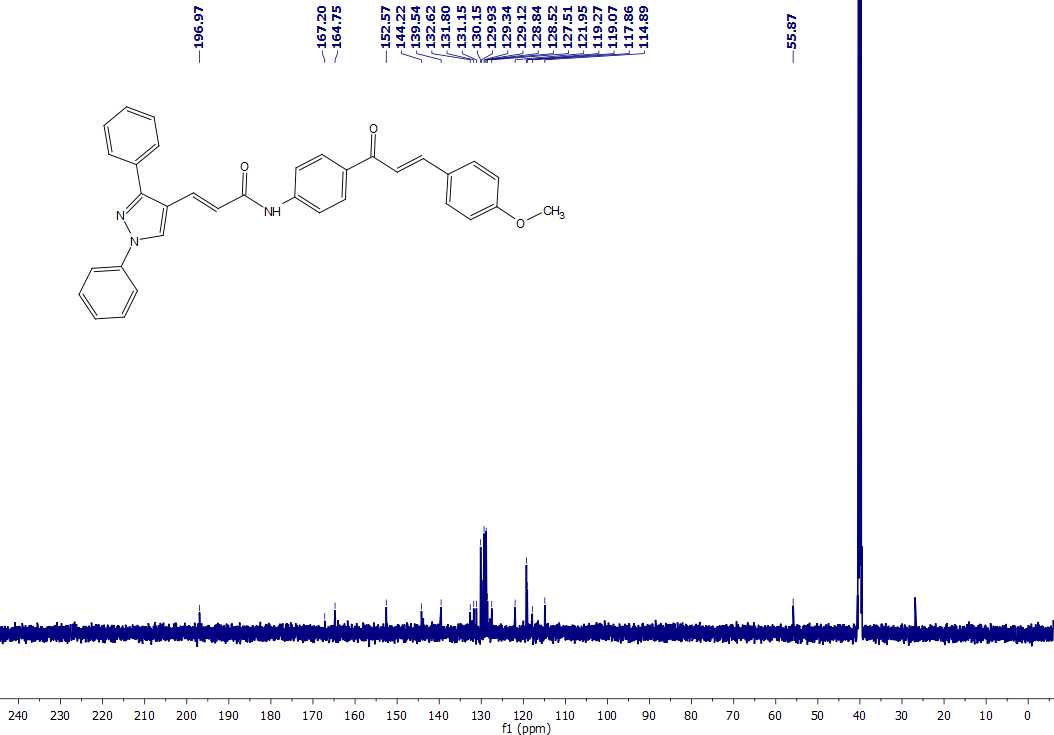
**

**1H NMR of 5c**

**
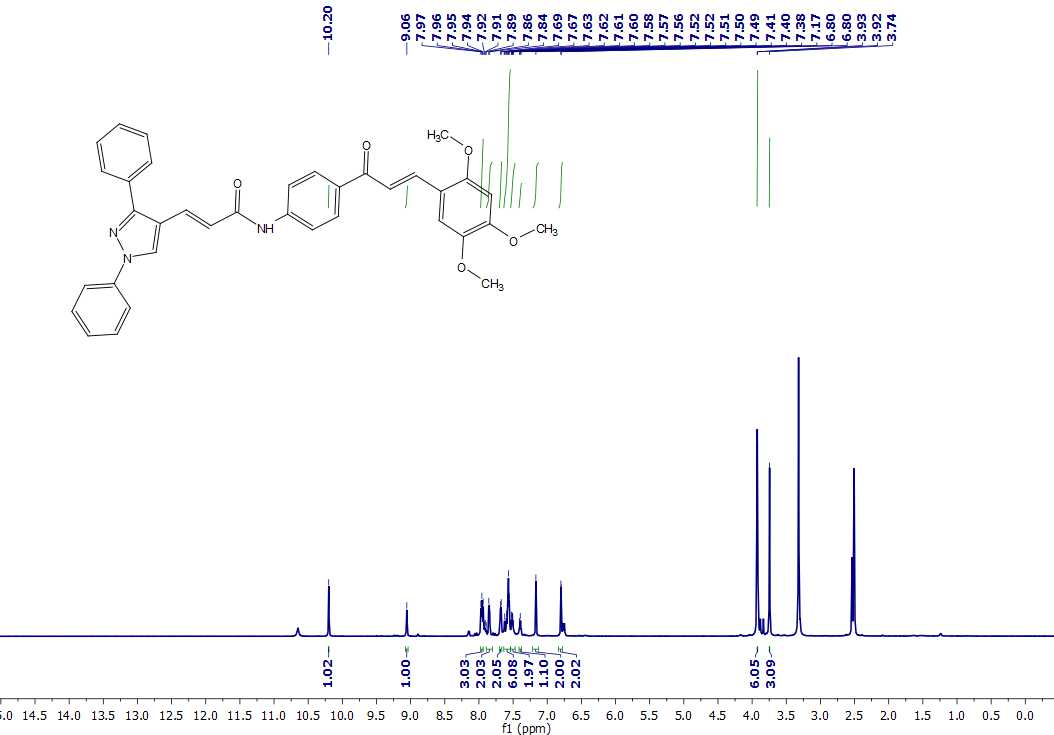
**

**13C NMR of 5c**

**1H NMR of 5d**

**
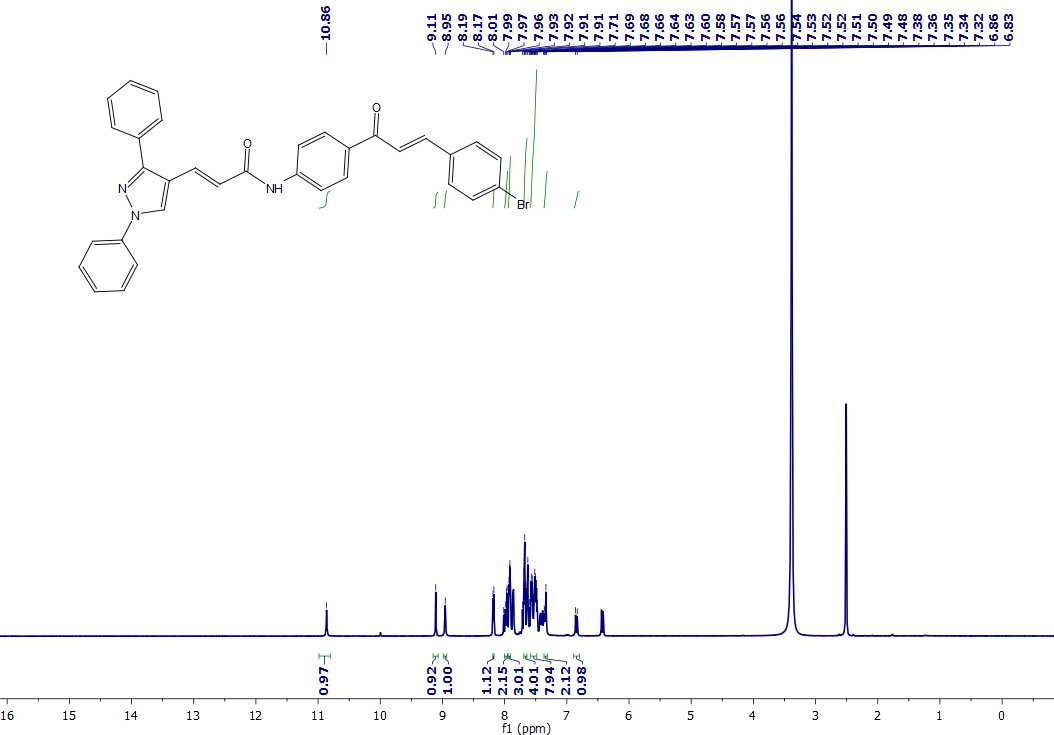
**

**13C NMR of 5d**

**
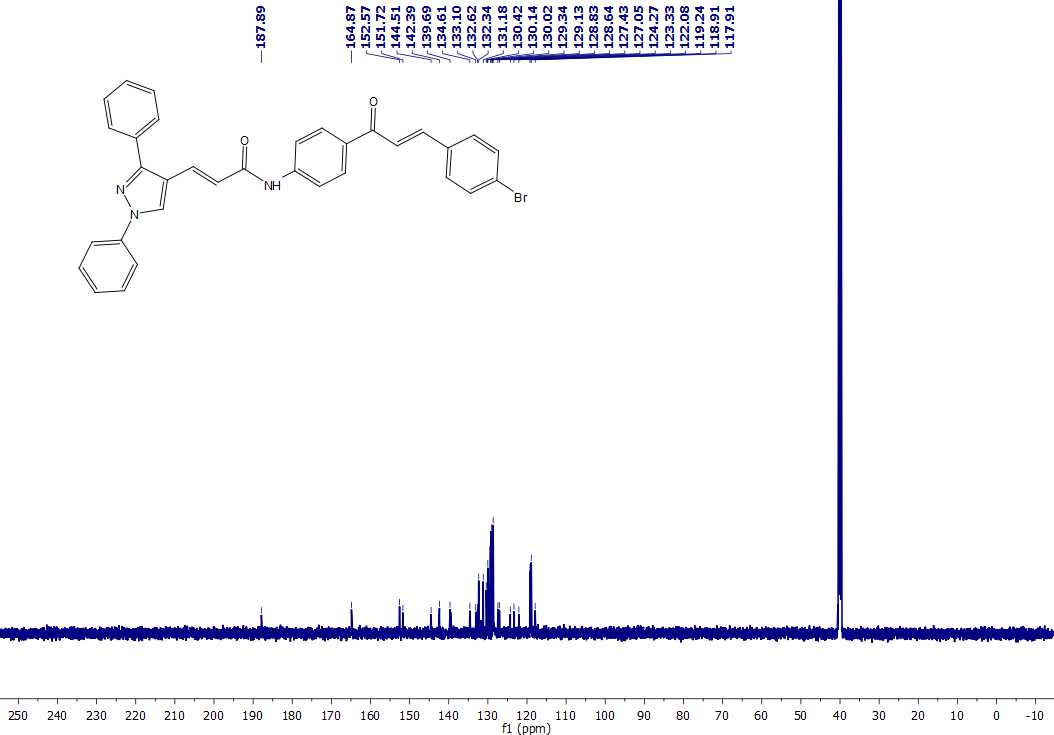
**

**1H NMR of 5e**

**
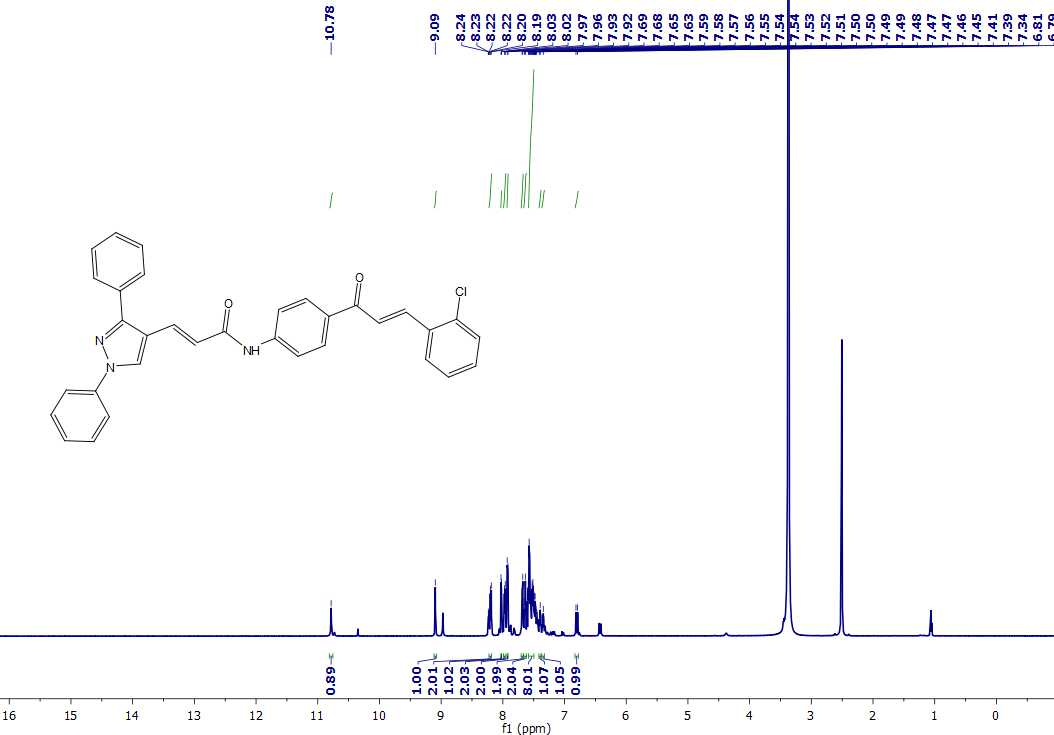
**

**13C NMR of 5e**

**
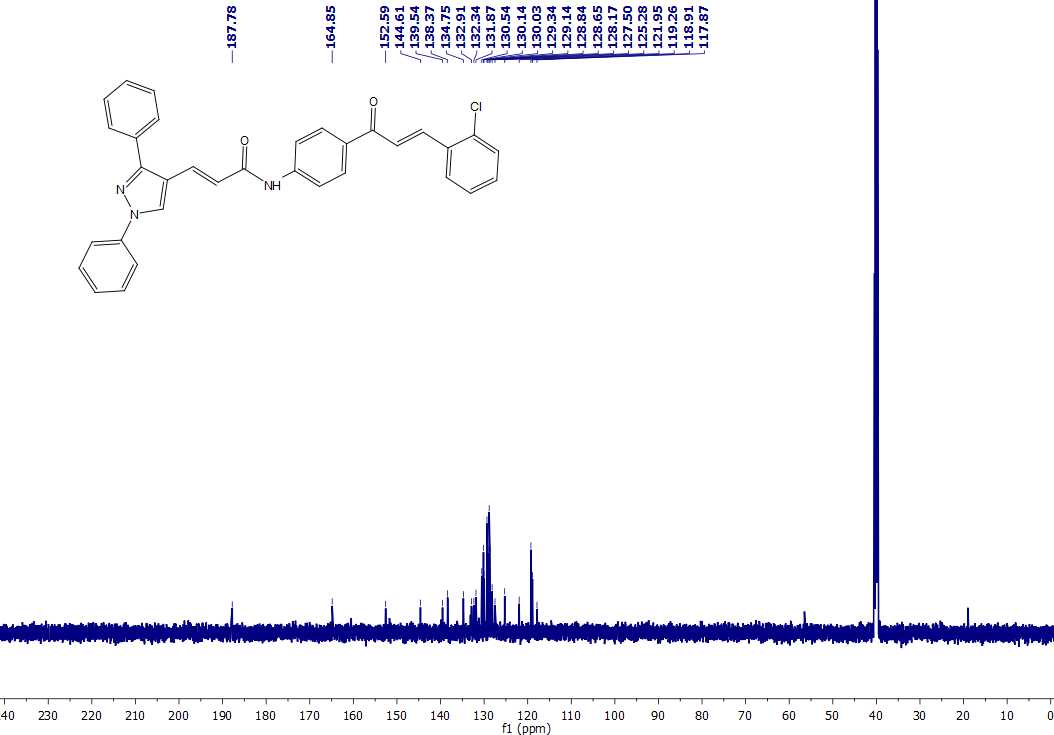
**

**1H NMR of 5f**

**
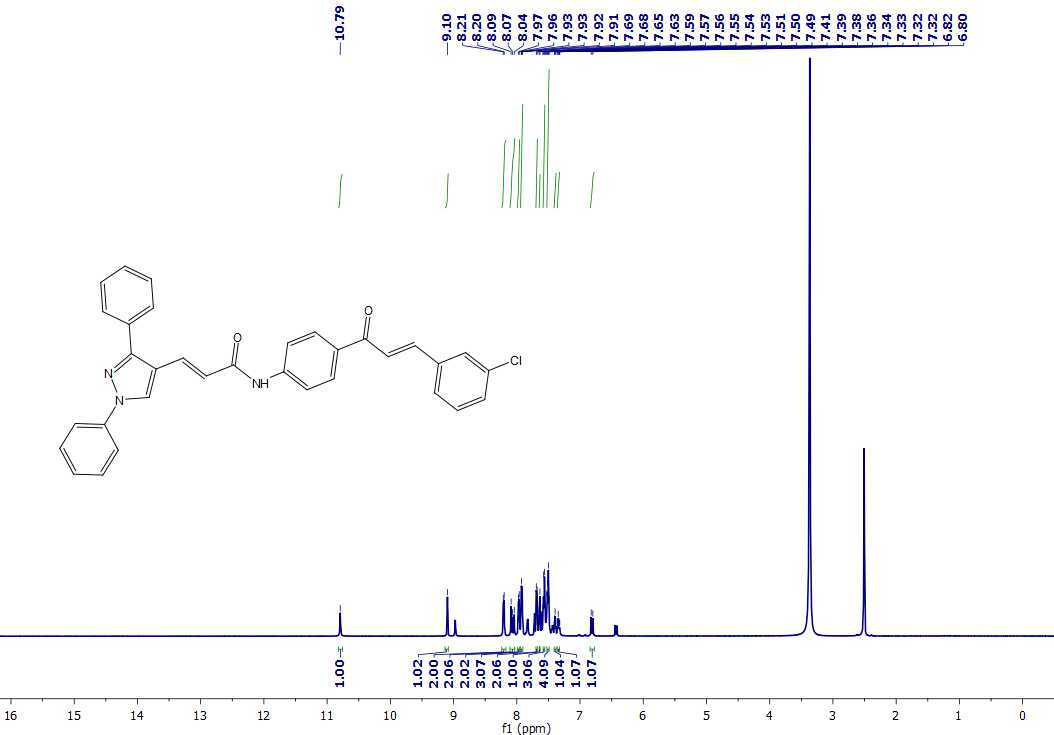
**

**13C NMR of 5f**

**
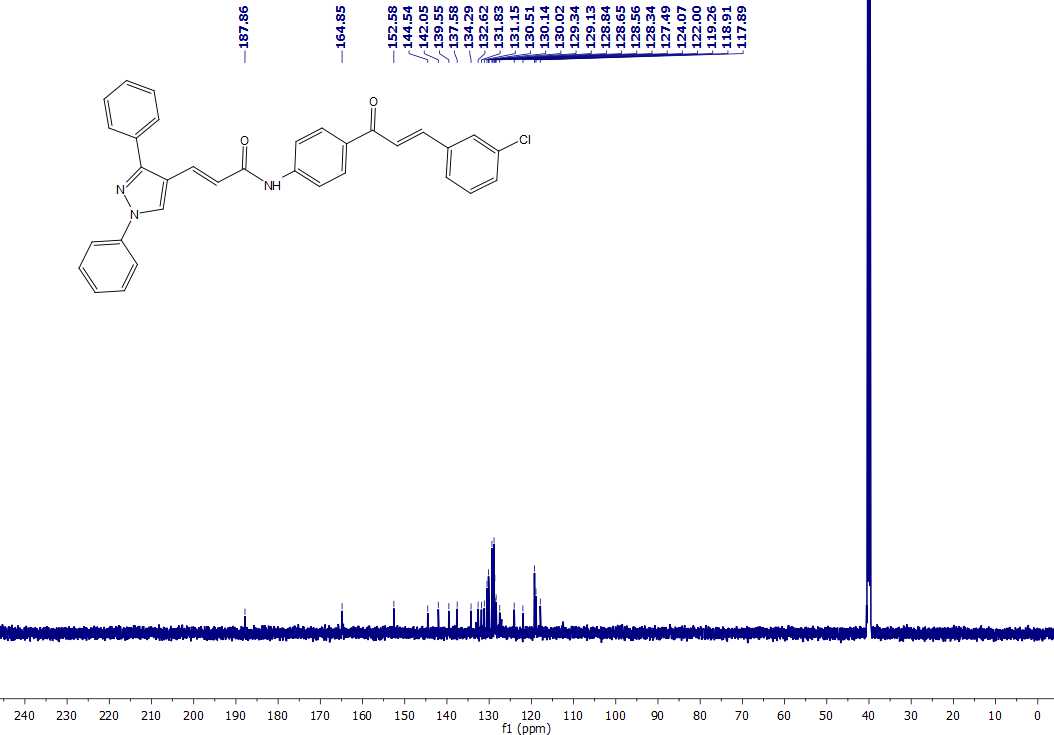
**

**1H NMR of 5g**

**
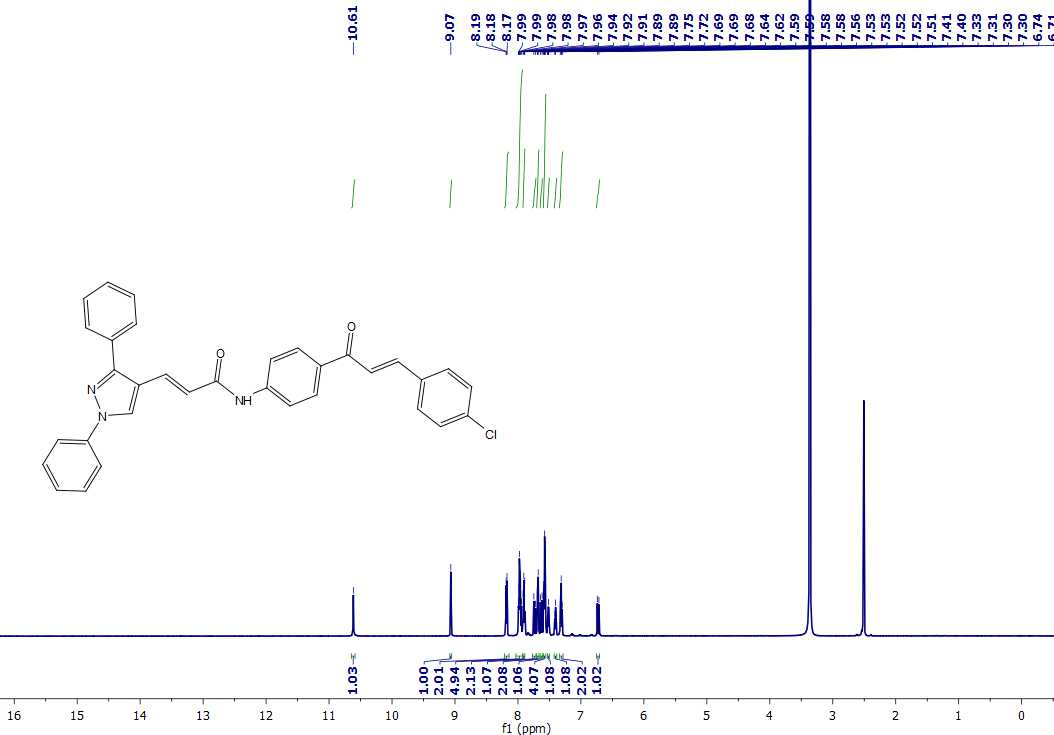
**

**13C NMR of 5g**

**
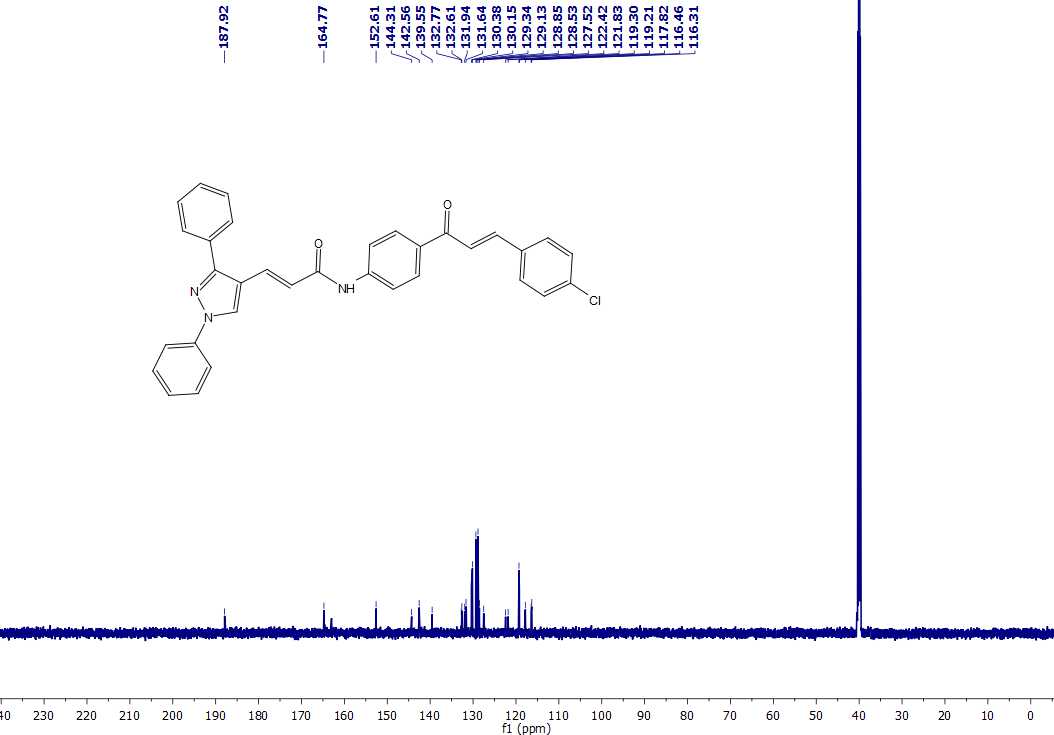
**

**1H NMR of 5h**

**
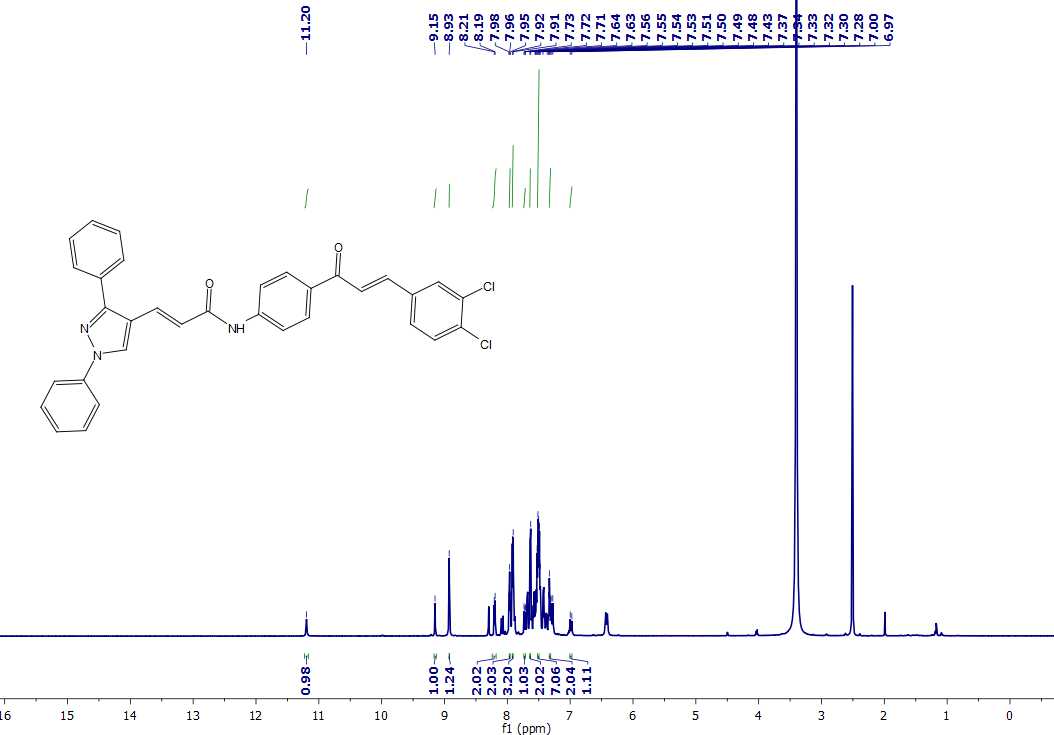
**

**13C NMR of 5h**

**
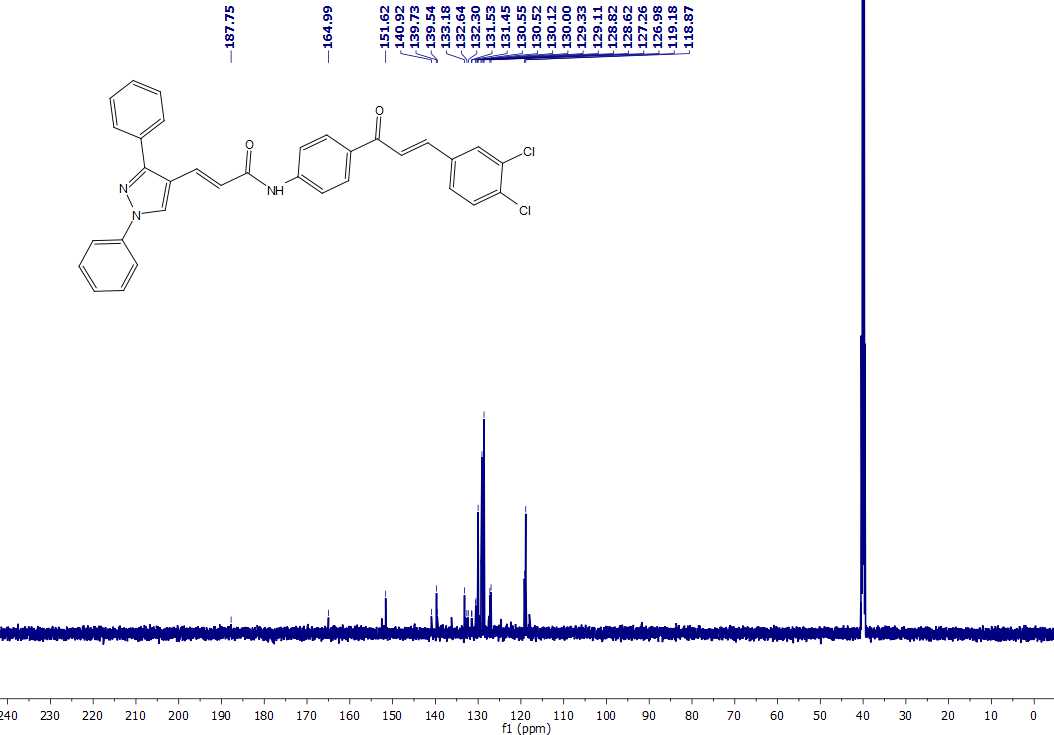
**

**1H NMR of 5i**

**
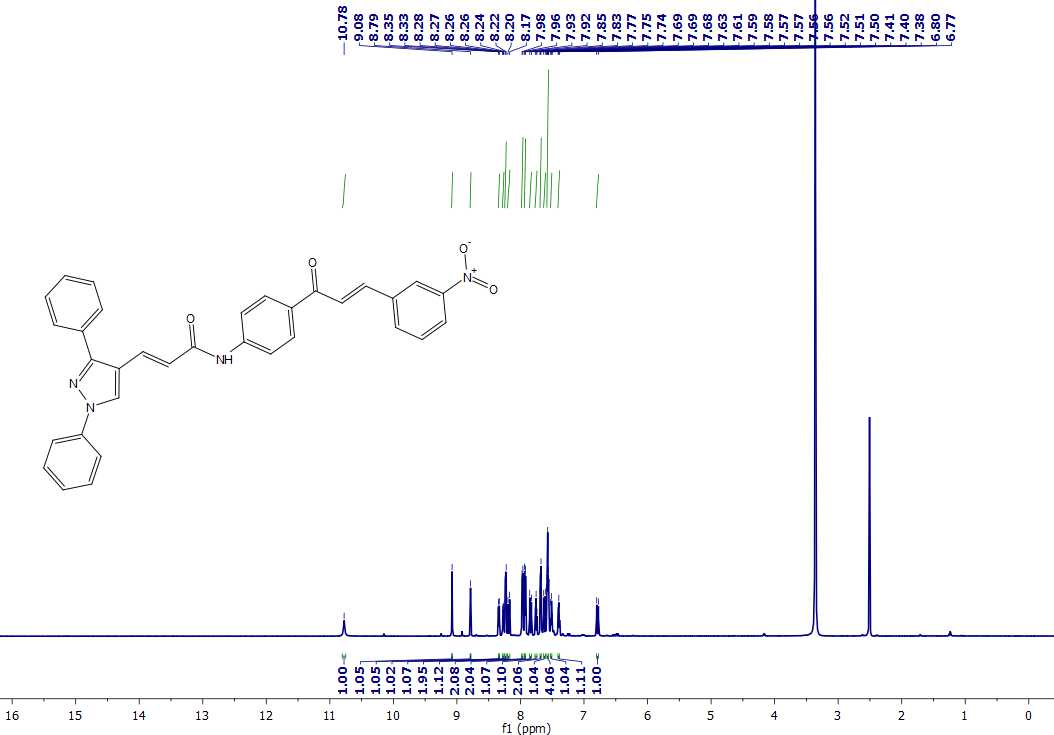
**

**13C NMR of 5i**

**
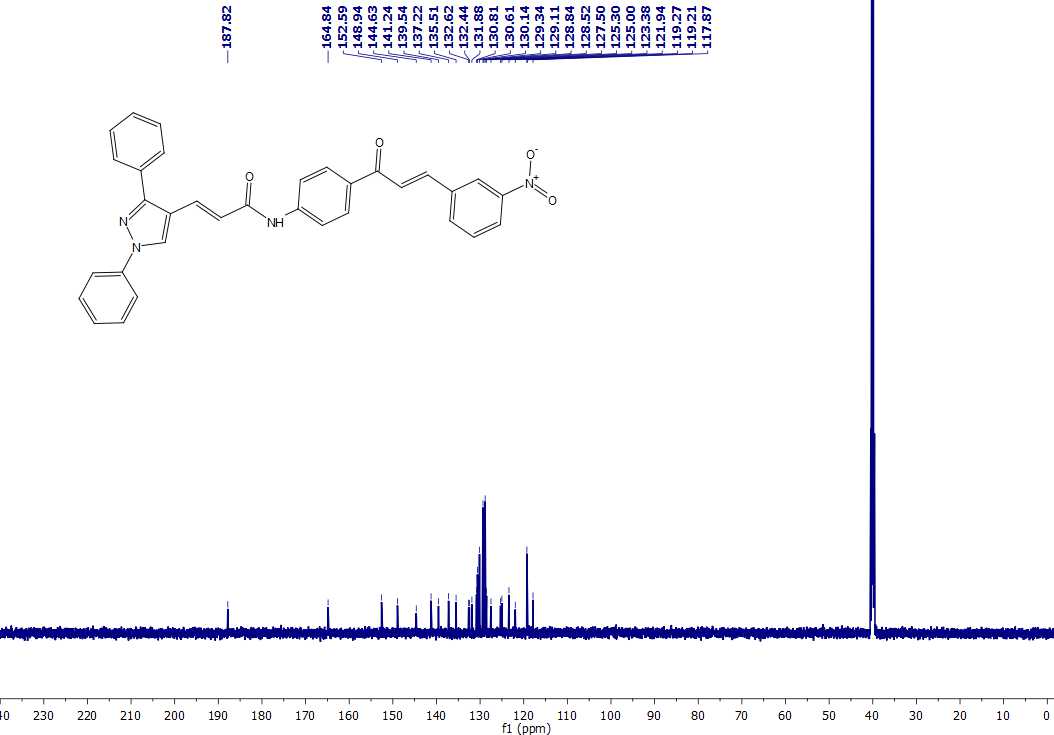
**

**1H NMR of 5j**

**
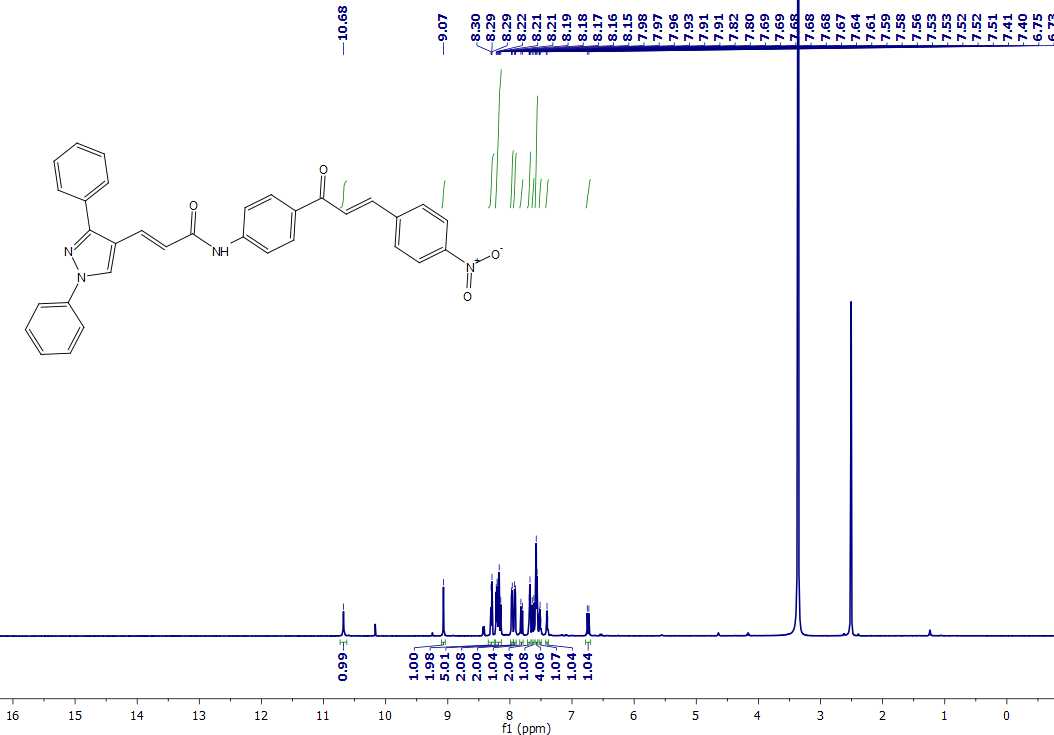
**

**13C NMR of 5j**

**
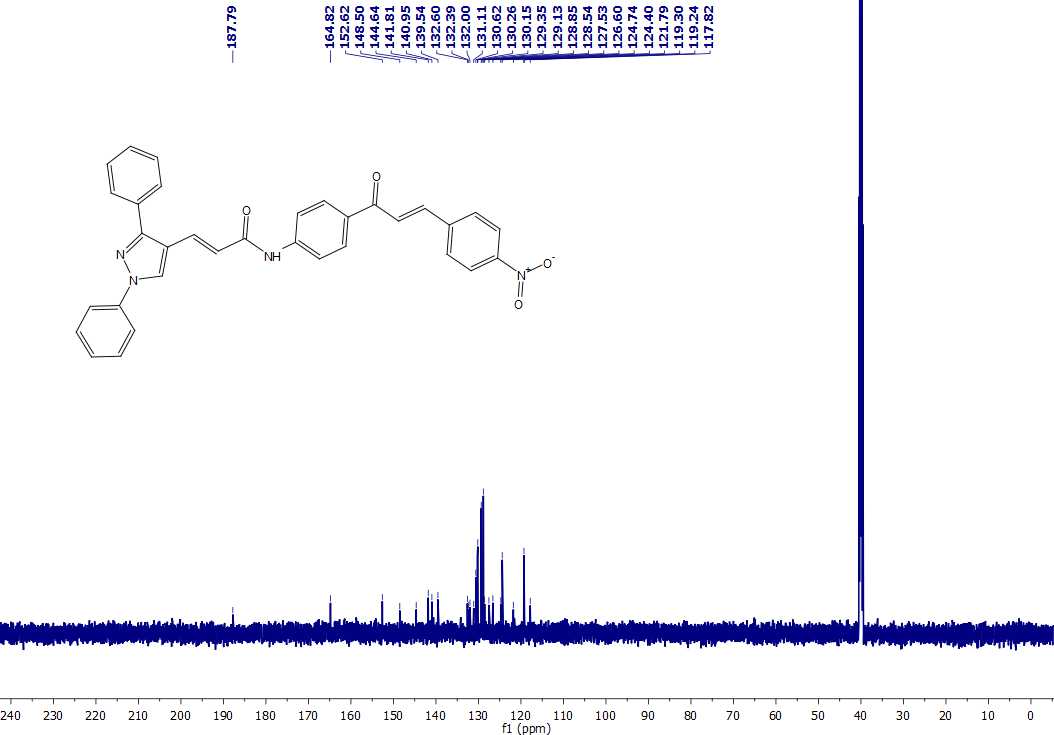
**

**1H NMR of 5k**

**
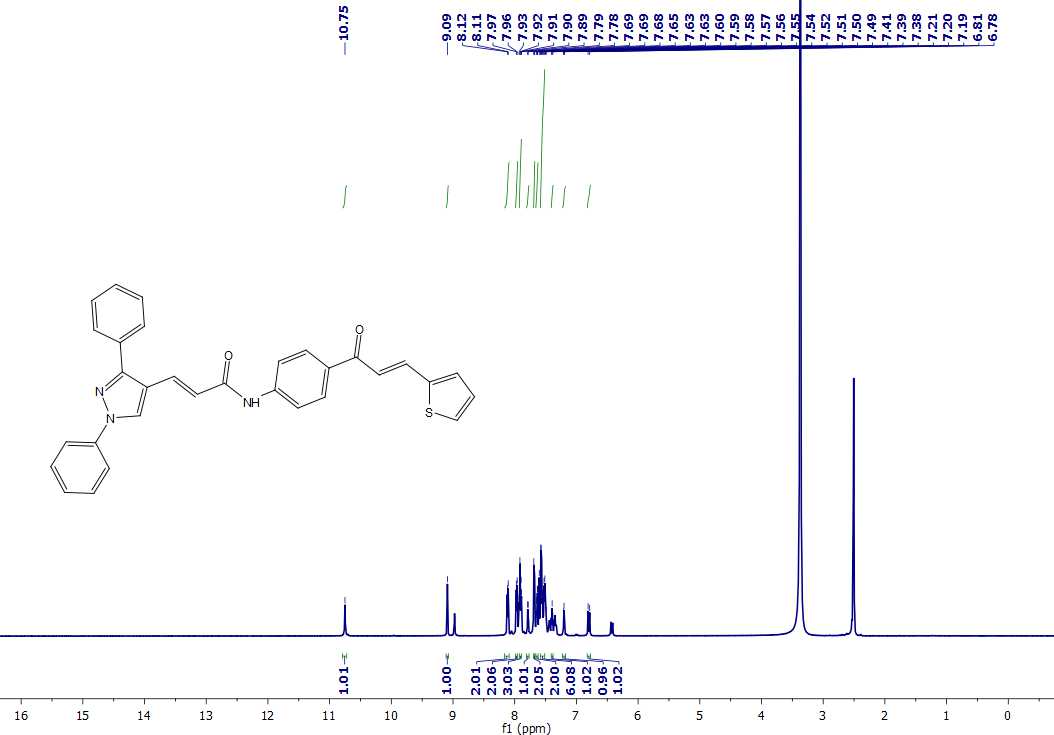
**

**13C NMR of 5k**

**
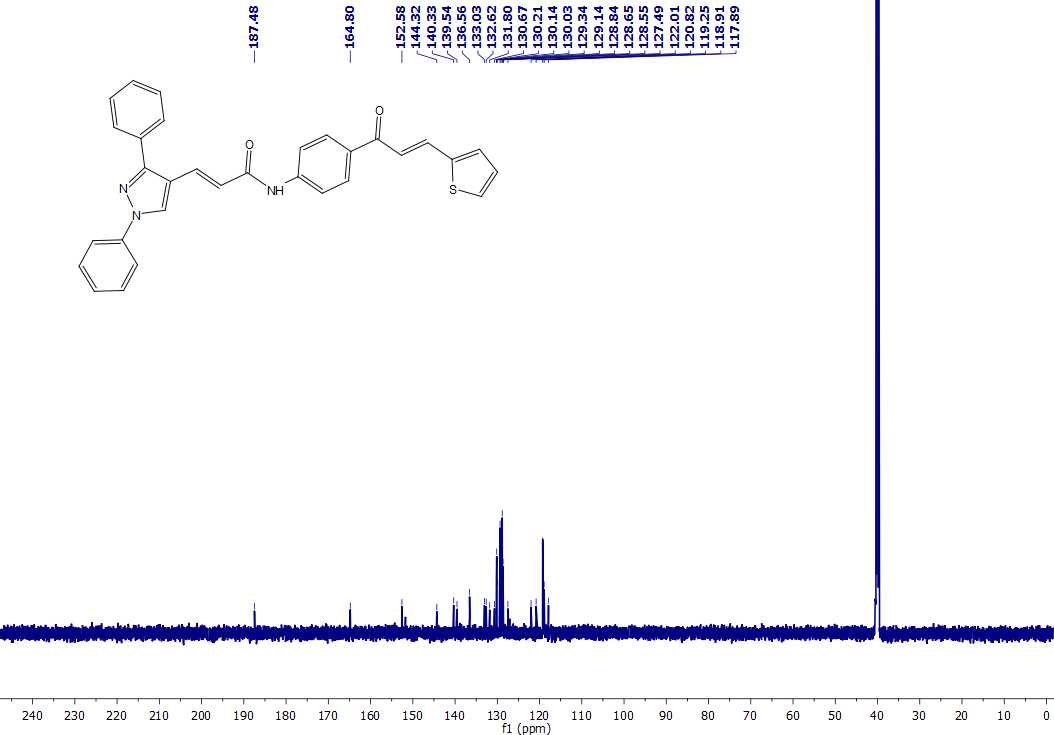
**

**1H NMR of 5l**

**
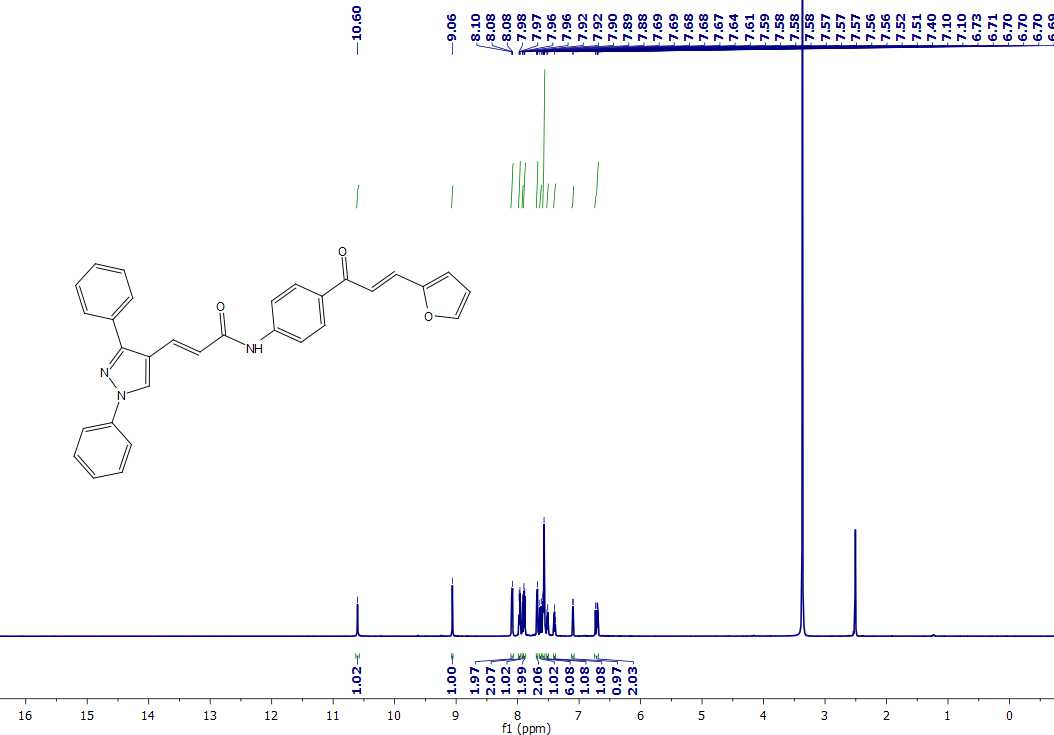
**

**13C NMR of 5l**

**
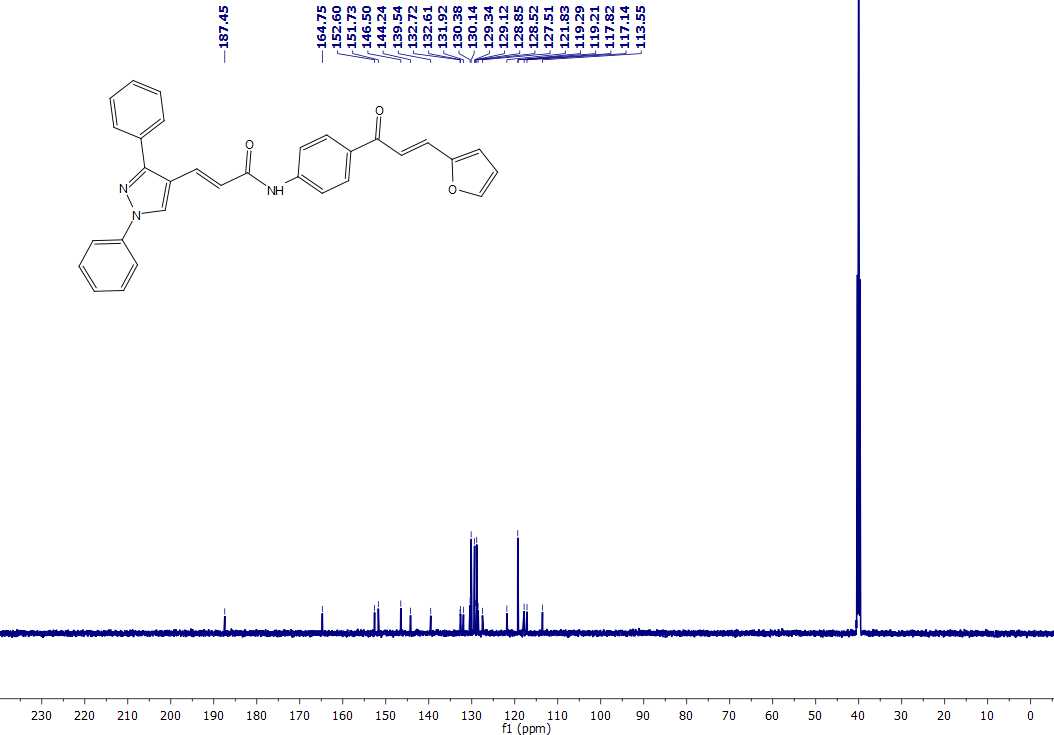
**

**1H NMR of 5m**

**
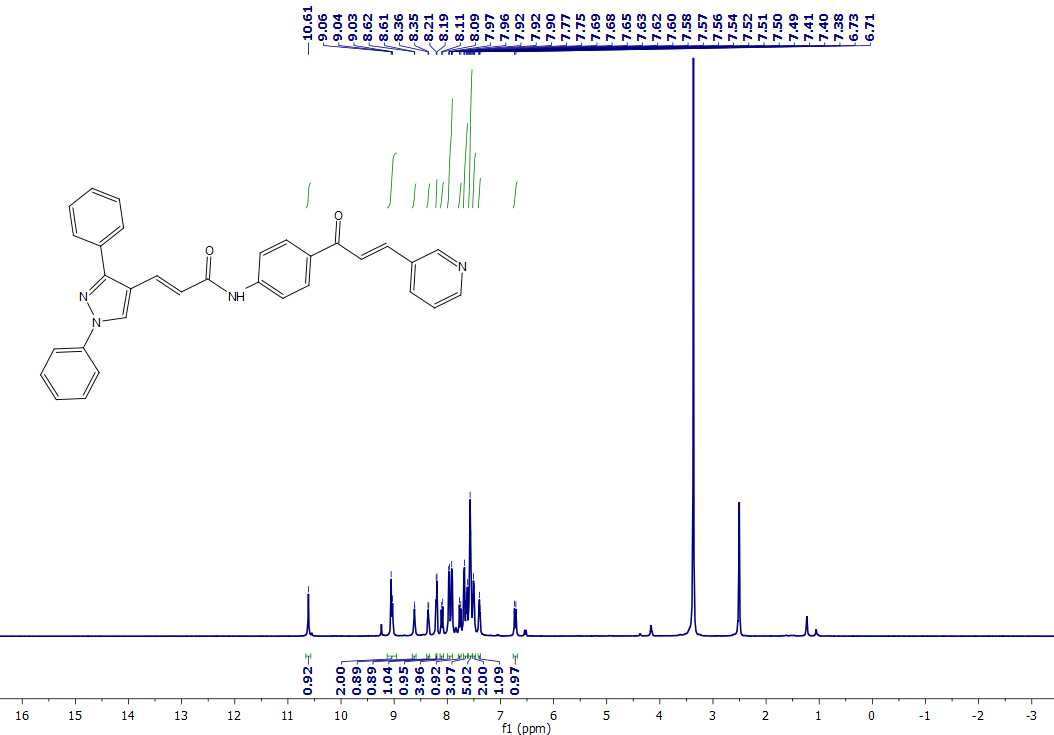
**

**13C NMR of 5m**

**
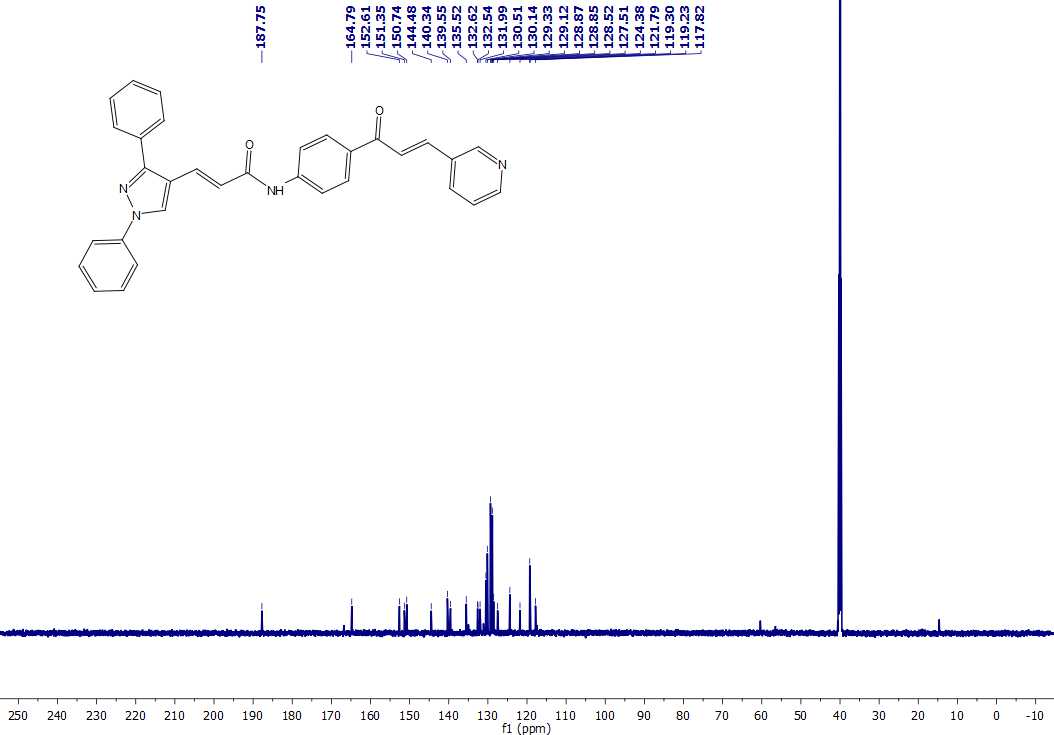
**

**HRMS spectra of 3**

**HRMS spectra of 5a**

**HRMS spectra of 5b**

**HRMS spectra of 5c**

**HRMS spectra of 5d**

**HRMS spectra of 5e**

**HRMS spectra of 5f**

**HRMS spectra of 5g**

**HRMS spectra of 5h**

**HRMS spectra of 5i**

**HRMS spectra of 5j**

**HRMS spectra of 5k**

**HRMS spectra of 5l**

**HRMS spectra of 5m**
